# Supplementary material
Source: Elsevier journal article supplement (https://www.sciencedirect.com/science/article/pii/S0213005X15003432)
Supplement: mmc1 [file S0213005X15003432:mmc1.pdf]

**Supplemental Table 1.** Different prevalence of *T. whipplei* in stools and/or saliva in asymptomatic carriers among previous studies.

| SAMPLES                                                                                                                   | PREVALENCE | COUNTRY     | REFERENCE<br>(publication date) |
|---------------------------------------------------------------------------------------------------------------------------|------------|-------------|---------------------------------|
| 40 saliva samples                                                                                                         | 35%        | England     | <a href="#">1</a>               |
| 215 saliva and stool samples                                                                                              | 7%         | Switzerland | <a href="#">2</a>               |
| 64 stool samples of sewage plant workers                                                                                  | 25%        | Austria     | <a href="#">3</a>               |
| 102 stool samples control subjects                                                                                        | 4%         | France      | <a href="#">4</a>               |
| 100 stool samples of sewage plant workers                                                                                 | 12%        |             |                                 |
| 231 salive samples of sewage plant workers                                                                                | 2.2%       |             |                                 |
| 299 stool samples                                                                                                         | 2.3%       | France      | <a href="#">5</a>               |
| 432 saliva samples                                                                                                        | 0.2%       | Senegal     | <a href="#">6</a>               |
| 150 stool samples (children)                                                                                              | 44%        |             | <a href="#">7</a>               |
| 446 stool samples                                                                                                         | 31.2%      | Senegal     |                                 |
| 370 saliva samples                                                                                                        | 3.5%       | France      | <a href="#">8</a>               |
| 64 stool samples from relatives of Whipple's disease patients, patients with chronic infection or asymptomatic carriers.  | 38%        |             |                                 |
| 70 saliva samples from relatives of Whipple's disease patients, patients with chronic infection or asymptomatic carriers. | 10%        |             |                                 |
| 162 stool samples from homeless people                                                                                    | 12.9%      | France      | <a href="#">9</a>               |
| 238 saliva samples from homeless people                                                                                   | 3.7%       |             |                                 |
| ≈75 stool samples                                                                                                         | 0-83.3%    | Senegal     | <a href="#">10</a>              |
| ≈58 saliva samples                                                                                                        | 0-8.3%     |             |                                 |
| 465 stool samples                                                                                                         | 19.6%      | Gabon       | <a href="#">11</a>              |
